# Supplementary material for: Pre-lithiation of onion-like carbon/MoS2nano-urchin anodes for high-performance rechargeable lithium ion batteries
Source: Royal Society of Chemistry journal article supplement (doi:10.1039/c4nr01553c), 2014-01-01
Supplement: c4nr01553c1.pdf [file c4nr01553c1.pdf]

## Support Information

### **Pre-lithiation of onion-like carbon/MoS<sub>2</sub> nano-urchin anodes for high-performance rechargeable lithium ion batteries**

Ye Wang<sup>1</sup>, Guozhong Xing<sup>2</sup>, Zhao Jun Han,<sup>3</sup> Yumeng Shi,<sup>1</sup> Jen It Wong,<sup>1</sup> Zhi Xiang Huang,<sup>1</sup> Kostya (Ken) Ostrikov,<sup>3,4,5</sup> Hui Ying Yang<sup>1†</sup>

<sup>1</sup> Pillar of Engineering Product Development, Singapore University of Technology and Design, 20 Dover Drive, 138682, Singapore

<sup>2</sup> School of Materials Science and Engineering, The University of New South Wales, Sydney, New South Wales 2052, Australia

<sup>3</sup> CSIRO Materials Science and Engineering, P.O. Box 218, Lindfield, New South Wales 2070, Australia

<sup>4</sup> School of Chemistry, Physics, and Mechanical Engineering, Queensland University of Technology, Brisbane, Queensland 4000, Australia

<sup>5</sup> School of Physics, The University of Sydney, New South Wales 2006, Australia

---

<sup>†</sup> Corresponding author. Tel.: +65 6303 6663; Fax: +65 6779 5161.  
*E-mail address:* yanghuiying@sutd.edu.sg (H. Y. Yang)

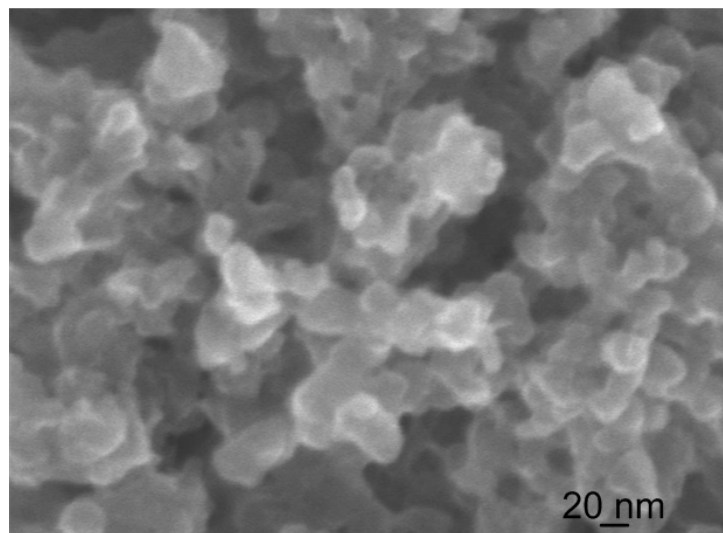

**Figure S1.** SEM image of onion-like carbon.

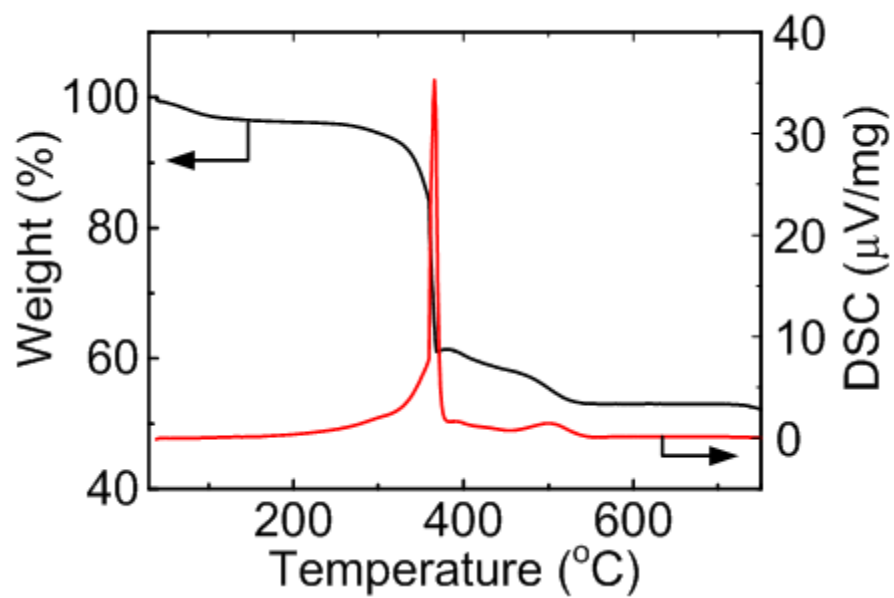

**Figure S2.** TGA and DSC curves of MoS<sub>2</sub>/OLC nano-urchins.

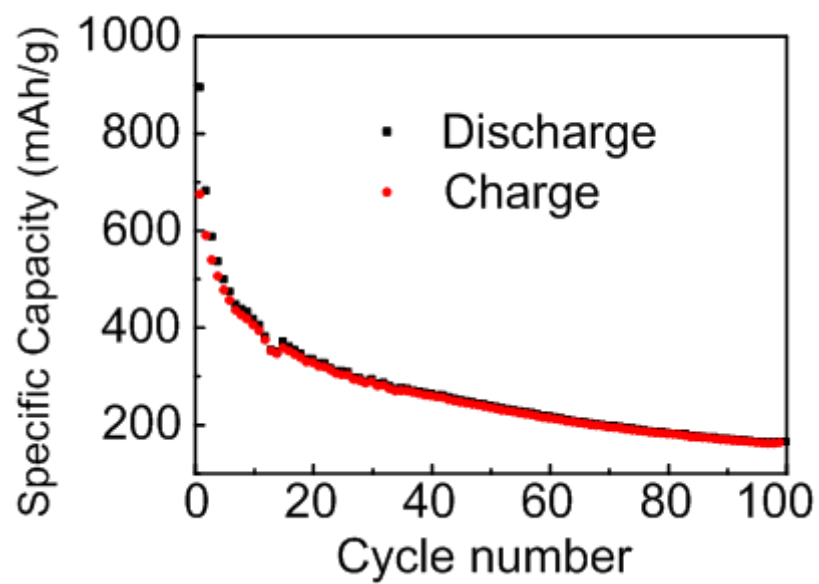

**Figure S3.** Cycling performance of commercial MoS<sub>2</sub>.
